# Supplementary material for: Changes in Diet Quality over 10 Years and Subsequent Mortality from Cardiovascular Disease in the Multiethnic Cohort Study
Source: MDPI journal article supplement (doi:10.3390/nu15153482), 2023-08-07
Supplement: s1 [file s1]

## Supplementary Tables

**Supplementary Table S1.** Characteristics of participants according to change in Alternative Healthy Eating Index (AHEI)-2010 over 10 years in the Multiethnic Cohort Study

|                                                           | Change in Alternative Healthy Eating Index (AHEI) – 2010 <sup>1</sup> |                  |             |                   |                   |
|-----------------------------------------------------------|-----------------------------------------------------------------------|------------------|-------------|-------------------|-------------------|
|                                                           | Greatest decline                                                      | Moderate decline | Stable      | Moderate increase | Greatest increase |
| <b>Men, n</b>                                             | 2,614                                                                 | 3,085            | 10,468      | 4,599             | 5,858             |
| AHEI-2010 score at baseline                               | 72.1 ± 8.8                                                            | 69.1 ± 9.1       | 65.8 ± 9.2  | 62.6 ± 8.8        | 58.6 ± 8.9        |
| AHEI-2010 score at 10-year follow-up                      | 57.2 ± 9.0                                                            | 61.9 ± 9.1       | 66.0 ± 9.2  | 69.9 ± 8.8        | 74.5 ± 8.9        |
| Age at baseline (years)                                   | 58.8 ± 8.3                                                            | 58.2 ± 8.4       | 57.8 ± 8.3  | 56.9 ± 8.4        | 56.1 ± 8.0        |
| Age at 10-year follow-up (years)                          | 69.7 ± 8.2                                                            | 69.1 ± 8.4       | 68.7 ± 8.3  | 67.8 ± 8.3        | 67.1 ± 7.9        |
| Race and ethnicity (%)                                    |                                                                       |                  |             |                   |                   |
| African American                                          | 11.6                                                                  | 10.0             | 7.9         | 6.8               | 6.0               |
| Japanese American                                         | 24.2                                                                  | 28.4             | 35.5        | 39.2              | 44.3              |
| Latino                                                    | 27.3                                                                  | 23.8             | 19.2        | 15.4              | 13.1              |
| Native Hawaiian                                           | 5.4                                                                   | 5.8              | 7.1         | 8.3               | 7.8               |
| White                                                     | 31.5                                                                  | 31.9             | 30.2        | 30.3              | 28.8              |
| Education (%)                                             |                                                                       |                  |             |                   |                   |
| ≤High school                                              | 34.7                                                                  | 29.6             | 28.2        | 26.4              | 26.4              |
| Vocational school                                         | 29.7                                                                  | 30.4             | 30.2        | 31.2              | 31.8              |
| ≥Graduated college                                        | 35.6                                                                  | 40.1             | 41.6        | 42.4              | 41.9              |
| Body mass index at baseline (kg/m <sup>2</sup> )          | 26.6 ± 3.8                                                            | 26.4 ± 3.7       | 26.3 ± 3.8  | 26.4 ± 3.7        | 26.4 ± 3.8        |
| Body mass index at 10-year follow-up (kg/m <sup>2</sup> ) | 26.9 ± 4.4                                                            | 26.8 ± 4.2       | 26.6 ± 4.2  | 26.6 ± 4.2        | 26.5 ± 4.1        |
| Smoking status at baseline (%)                            |                                                                       |                  |             |                   |                   |
| Never                                                     | 36.0                                                                  | 36.3             | 38.2        | 38.2              | 34.3              |
| Former                                                    | 51.3                                                                  | 50.5             | 49.5        | 48.6              | 51.2              |
| Current                                                   | 12.7                                                                  | 13.3             | 12.3        | 13.1              | 14.6              |
| Smoking status at 10-year follow-up (%)                   |                                                                       |                  |             |                   |                   |
| Never                                                     | 36.2                                                                  | 36.4             | 38.3        | 38.4              | 34.3              |
| Former                                                    | 55.7                                                                  | 55.8             | 54.6        | 54.9              | 58.8              |
| Current                                                   | 8.1                                                                   | 7.8              | 7.2         | 6.7               | 6.9               |
| Physical activity at baseline (h/d)                       | 1.5 ± 1.6                                                             | 1.5 ± 1.5        | 1.5 ± 1.5   | 1.5 ± 1.5         | 1.5 ± 1.5         |
| Physical activity at 10-year follow-up (h/d)              | 1.5 ± 1.6                                                             | 1.6 ± 1.6        | 1.6 ± 1.6   | 1.7 ± 1.7         | 1.8 ± 1.7         |
| Alcohol intake at baseline (g/day)                        | 12.2 ± 19.7                                                           | 12.7 ± 22.9      | 12.9 ± 25.4 | 15.4 ± 29.2       | 20.4 ± 36.4       |
| Alcohol intake at 10-year follow-up (g/day)               | 12.1 ± 24.8                                                           | 11.5 ± 21.8      | 10.7 ± 20.3 | 12.1 ± 20.5       | 12.5 ± 17.7       |
| History of hypertension at either survey                  | 52.9                                                                  | 53.0             | 52.4        | 51.9              | 52.8              |
| <b>Women, n</b>                                           | 3,472                                                                 | 4,058            | 13,522      | 6,019             | 7,666             |
| AHEI-2010 score at baseline                               | 72.3 ± 8.4                                                            | 69.7 ± 8.5       | 67.0 ± 8.6  | 64.0 ± 8.3        | 60.1 ± 8.3        |
| AHEI-2010 score at 10-year follow-up                      | 58.2 ± 8.6                                                            | 62.9 ± 8.5       | 67.2 ± 8.7  | 71.0 ± 8.3        | 75.1 ± 8.2        |
| Age at baseline (years)                                   | 59.0 ± 8.4                                                            | 58.3 ± 8.3       | 57.8 ± 8.2  | 56.7 ± 8.2        | 55.4 ± 8.0        |
| Age at 10-year follow-up (years)                          | 70.0 ± 8.4                                                            | 69.2 ± 8.3       | 68.8 ± 8.2  | 67.7 ± 8.2        | 66.5 ± 8.0        |
| Race and ethnicity (%)                                    |                                                                       |                  |             |                   |                   |
| African American                                          | 17.5                                                                  | 14.8             | 11.4        | 9.7               | 8.9               |
| Japanese American                                         | 22.3                                                                  | 29.2             | 35.1        | 39.0              | 39.0              |
| Latino                                                    | 23.6                                                                  | 19.5             | 16.2        | 13.1              | 10.7              |
| Native Hawaiian                                           | 6.2                                                                   | 6.5              | 7.7         | 8.0               | 8.9               |
| White                                                     | 30.4                                                                  | 30.0             | 29.6        | 30.1              | 32.4              |
| Education (%)                                             |                                                                       |                  |             |                   |                   |
| ≤High school                                              | 39.6                                                                  | 37.1             | 34.4        | 31.0              | 27.4              |
| Vocational school                                         | 31.9                                                                  | 31.7             | 31.7        | 32.4              | 33.3              |
| ≥Graduated college                                        | 28.6                                                                  | 31.1             | 33.9        | 36.6              | 39.3              |
| Body mass index at baseline (kg/m <sup>2</sup> )          | 26.2 ± 5.2                                                            | 25.7 ± 5.0       | 25.5 ± 5.1  | 25.3 ± 4.9        | 25.3 ± 5.0        |
| Body mass index at 10-year follow-up (kg/m <sup>2</sup> ) | 26.7 ± 5.7                                                            | 26.2 ± 5.5       | 26.0 ± 5.5  | 25.7 ± 5.2        | 25.7 ± 5.3        |
| Smoking status at baseline (%)                            |                                                                       |                  |             |                   |                   |
| Never                                                     | 56.1                                                                  | 60.5             | 63.1        | 63.2              | 60.2              |
| Former                                                    | 31.4                                                                  | 29.5             | 26.4        | 27.2              | 28.1              |
| Current                                                   | 12.6                                                                  | 10.0             | 10.6        | 9.6               | 11.7              |
| Smoking status at 10-year follow-up (%)                   |                                                                       |                  |             |                   |                   |
| Never                                                     | 56.4                                                                  | 60.7             | 63.2        | 63.2              | 60.3              |
| Former                                                    | 35.9                                                                  | 33.1             | 31.3        | 32.0              | 34.3              |
| Current                                                   | 7.7                                                                   | 6.2              | 5.5         | 4.8               | 5.4               |
| Physical activity at baseline (h/d)                       | 1.2 ± 1.3                                                             | 1.2 ± 1.3        | 1.2 ± 1.3   | 1.3 ± 1.3         | 1.2 ± 1.3         |
| Physical activity at 10-year follow-up (h/d)              | 1.3 ± 1.4                                                             | 1.3 ± 1.4        | 1.4 ± 1.4   | 1.5 ± 1.5         | 1.5 ± 1.5         |
| Alcohol intake at baseline (g/day)                        | 5.4 ± 12.6                                                            | 4.3 ± 11.0       | 4.2 ± 12.4  | 4.8 ± 15.4        | 5.8 ± 17.3        |
| Alcohol intake at 10-year follow-up (g/day)               | 4.9 ± 13.9                                                            | 3.9 ± 11.1       | 3.7 ± 10.3  | 3.8 ± 9.4         | 4.6 ± 9.7         |
| History of hypertension at either survey                  | 55.4                                                                  | 54.1             | 52.1        | 50.2              | 48.8              |

<sup>1</sup>Greatest decline: ≥ 1 SD decrease; moderate decline: 0.5- < 1 SD decrease; stable: < 0.5 SD change; moderate increase: 0.5- < 1 SD increase; greatest increase: ≥ 1 SD increase.

**Supplementary Table S2.** Characteristics of participants according to change in alternate Mediterranean Diet (aMED) over 10 years in the Multiethnic Cohort Study

|                                                           | Change in alternate Mediterranean Diet (aMED) <sup>1</sup> |                  |             |                   |                   |
|-----------------------------------------------------------|------------------------------------------------------------|------------------|-------------|-------------------|-------------------|
|                                                           | Greatest decline                                           | Moderate decline | Stable      | Moderate increase | Greatest increase |
| <b>Men, n</b>                                             | 4,915                                                      | 4,829            | 5,963       | 5,146             | 5,771             |
| aMED score at baseline                                    | 5.6 ± 1.4                                                  | 4.8 ± 1.6        | 4.3 ± 1.7   | 3.9 ± 1.6         | 3.0 ± 1.4         |
| aMED score at 10-year follow-up                           | 3.0 ± 1.4                                                  | 3.8 ± 1.6        | 4.3 ± 1.7   | 4.9 ± 1.6         | 5.6 ± 1.4         |
| Age at baseline (years)                                   | 58.1 ± 8.4                                                 | 57.9 ± 8.5       | 57.4 ± 8.2  | 57.1 ± 8.3        | 56.7 ± 8.1        |
| Age at 10-year follow-up (years)                          | 69.1 ± 8.4                                                 | 68.8 ± 8.5       | 68.4 ± 8.2  | 68.1 ± 8.2        | 67.6 ± 8.0        |
| Race and ethnicity (%)                                    |                                                            |                  |             |                   |                   |
| African American                                          | 9.2                                                        | 8.7              | 7.6         | 7.2               | 7.3               |
| Japanese American                                         | 32.7                                                       | 36.0             | 36.0        | 37.6              | 38.2              |
| Latino                                                    | 18.9                                                       | 16.6             | 19.0        | 18.6              | 19.2              |
| Native Hawaiian                                           | 7.3                                                        | 7.4              | 7.6         | 6.6               | 6.8               |
| White                                                     | 32.0                                                       | 31.3             | 29.8        | 30.1              | 28.5              |
| Education (%)                                             |                                                            |                  |             |                   |                   |
| ≤High school                                              | 29.5                                                       | 28.6             | 28.9        | 27.9              | 26.7              |
| Vocational school                                         | 30.0                                                       | 30.5             | 30.5        | 31.6              | 30.8              |
| ≥Graduated college                                        | 40.4                                                       | 40.9             | 40.6        | 40.5              | 42.5              |
| Body mass index at baseline (kg/m <sup>2</sup> )          | 26.4 ± 3.8                                                 | 26.4 ± 3.8       | 26.4 ± 3.7  | 26.3 ± 3.8        | 26.3 ± 3.8        |
| Body mass index at 10-year follow-up (kg/m <sup>2</sup> ) | 26.7 ± 4.3                                                 | 26.7 ± 4.3       | 26.7 ± 4.2  | 26.6 ± 4.2        | 26.6 ± 4.2        |
| Smoking status at baseline (%)                            |                                                            |                  |             |                   |                   |
| Never                                                     | 36.8                                                       | 38.2             | 37.0        | 36.9              | 35.8              |
| Former                                                    | 50.3                                                       | 49.1             | 50.2        | 50.2              | 50.2              |
| Current                                                   | 12.9                                                       | 12.7             | 12.9        | 13.0              | 14.1              |
| Smoking status at 10-year follow-up (%)                   |                                                            |                  |             |                   |                   |
| Never                                                     | 36.8                                                       | 38.3             | 37.1        | 37.0              | 36.0              |
| Former                                                    | 55.8                                                       | 54.5             | 55.4        | 56.1              | 57.1              |
| Current                                                   | 7.4                                                        | 7.2              | 7.5         | 6.9               | 6.9               |
| Physical activity at baseline (h/d)                       | 1.5 ± 1.5                                                  | 1.5 ± 1.5        | 1.5 ± 1.5   | 1.5 ± 1.5         | 1.4 ± 1.5         |
| Physical activity at 10-year follow-up (h/d)              | 1.5 ± 1.6                                                  | 1.6 ± 1.7        | 1.7 ± 1.6   | 1.7 ± 1.6         | 1.7 ± 1.7         |
| Alcohol intake at baseline (g/day)                        | 14.7 ± 27.3                                                | 14.6 ± 28.5      | 14.4 ± 27.3 | 15.2 ± 29.2       | 15.6 ± 29.3       |
| Alcohol intake at 10-year follow-up (g/day)               | 10.8 ± 20.4                                                | 10.9 ± 20.1      | 11.3 ± 20.5 | 11.9 ± 21.1       | 12.6 ± 20.2       |
| History of hypertension at either survey                  | 53.7                                                       | 53.9             | 52.2        | 52.1              | 51.1              |
| <b>Women, n</b>                                           | 6,445                                                      | 6,191            | 7,819       | 6,669             | 7,613             |
| aMED score at baseline                                    | 5.5 ± 1.4                                                  | 4.7 ± 1.6        | 4.3 ± 1.7   | 3.7 ± 1.6         | 2.9 ± 1.4         |
| aMED score at 10-year follow-up                           | 2.9 ± 1.4                                                  | 3.7 ± 1.6        | 4.3 ± 1.7   | 4.7 ± 1.6         | 5.5 ± 1.4         |
| Age at baseline (years)                                   | 58.4 ± 8.4                                                 | 57.9 ± 8.3       | 57.5 ± 8.2  | 56.8 ± 8.2        | 56.1 ± 8.1        |
| Age at 10-year follow-up (years)                          | 69.4 ± 8.3                                                 | 68.8 ± 8.4       | 68.4 ± 8.2  | 67.8 ± 8.2        | 67.1 ± 8.1        |
| Race and ethnicity (%)                                    |                                                            |                  |             |                   |                   |
| African American                                          | 13.7                                                       | 11.7             | 10.7        | 10.9              | 11.1              |
| Japanese American                                         | 32.5                                                       | 34.7             | 35.9        | 36.0              | 34.0              |
| Latino                                                    | 15.4                                                       | 14.5             | 15.1        | 15.8              | 16.9              |
| Native Hawaiian                                           | 7.9                                                        | 7.8              | 7.5         | 8.1               | 7.4               |
| White                                                     | 30.5                                                       | 31.3             | 30.8        | 29.2              | 30.6              |
| Education (%)                                             |                                                            |                  |             |                   |                   |
| ≤High school                                              | 36.0                                                       | 33.9             | 32.7        | 32.4              | 31.1              |
| Vocational school                                         | 31.1                                                       | 32.3             | 32.8        | 32.4              | 32.2              |
| ≥Graduated college                                        | 32.8                                                       | 33.8             | 34.6        | 35.1              | 36.7              |
| Body mass index at baseline (kg/m <sup>2</sup> )          | 25.8 ± 5.1                                                 | 25.6 ± 5.1       | 25.5 ± 5.0  | 25.4 ± 5.1        | 25.3 ± 4.9        |
| Body mass index at 10-year follow-up (kg/m <sup>2</sup> ) | 26.2 ± 5.5                                                 | 26.1 ± 5.5       | 25.9 ± 5.4  | 25.9 ± 5.4        | 25.8 ± 5.2        |
| Smoking status at baseline (%)                            |                                                            |                  |             |                   |                   |
| Never                                                     | 60.0                                                       | 61.3             | 61.9        | 62.1              | 61.7              |
| Former                                                    | 29.4                                                       | 28.4             | 27.3        | 26.8              | 27.2              |
| Current                                                   | 10.6                                                       | 10.4             | 10.7        | 11.1              | 11.0              |
| Smoking status at 10-year follow-up (%)                   |                                                            |                  |             |                   |                   |
| Never                                                     | 60.3                                                       | 61.4             | 62.1        | 62.2              | 61.9              |
| Former                                                    | 33.9                                                       | 32.9             | 32.1        | 32.1              | 33.0              |
| Current                                                   | 5.9                                                        | 5.8              | 5.9         | 5.7               | 5.1               |
| Physical activity at baseline (h/d)                       | 1.2 ± 1.3                                                  | 1.2 ± 1.3        | 1.2 ± 1.3   | 1.2 ± 1.3         | 1.2 ± 1.3         |
| Physical activity at 10-year follow-up (h/d)              | 1.3 ± 1.4                                                  | 1.4 ± 1.5        | 1.4 ± 1.4   | 1.5 ± 1.5         | 1.5 ± 1.5         |
| Alcohol intake at baseline (g/day)                        | 5.0 ± 13.9                                                 | 4.8 ± 13.6       | 4.8 ± 14.0  | 4.6 ± 14.1        | 4.7 ± 14.4        |
| Alcohol intake at 10-year follow-up (g/day)               | 4.1 ± 11.1                                                 | 4.0 ± 10.8       | 4.1 ± 10.9  | 4.0 ± 10.4        | 4.1 ± 9.6         |
| History of hypertension at either survey                  | 54.6                                                       | 53.0             | 51.4        | 50.8              | 48.8              |

<sup>1</sup>Greatest decline: ≥ 1 SD decrease; moderate decline: 0.5-< 1 SD decrease; stable: < 0.5 SD change; moderate increase: 0.5-< 1 SD increase; greatest increase: ≥ 1 SD increase.

**Supplementary Table S3.** Characteristics of participants according to change in Dietary Approaches to Stop Hypertension (DASH) over 10 years in the Multiethnic Cohort Study

|                                                           | Change in Dietary Approaches to Stop Hypertension (DASH) <sup>1</sup> |                  |             |                   |                   |
|-----------------------------------------------------------|-----------------------------------------------------------------------|------------------|-------------|-------------------|-------------------|
|                                                           | Greatest decline                                                      | Moderate decline | Stable      | Moderate increase | Greatest increase |
| <b>Men, n</b>                                             | 1926                                                                  | 2609             | 12582       | 4337              | 5170              |
| DASH score at baseline                                    | 28.1 ± 3.6                                                            | 26.4 ± 3.8       | 24.6 ± 4.2  | 22.8 ± 4.2        | 21.1 ± 3.9        |
| DASH score at 10-year follow-up                           | 21.6 ± 3.6                                                            | 23.0 ± 3.8       | 24.7 ± 4.2  | 26.3 ± 4.2        | 28.0 ± 3.9        |
| Age at baseline (years)                                   | 58.6 ± 8.7                                                            | 58.2 ± 8.5       | 57.6 ± 8.3  | 57.0 ± 8.2        | 56.4 ± 7.9        |
| Age at 10-year follow-up (years)                          | 69.6 ± 8.7                                                            | 69.2 ± 8.5       | 68.5 ± 8.3  | 68.0 ± 8.2        | 67.5 ± 7.8        |
| Race and ethnicity (%)                                    |                                                                       |                  |             |                   |                   |
| African American                                          | 11.5                                                                  | 9.4              | 8.1         | 6.9               | 6.3               |
| Japanese American                                         | 27.3                                                                  | 29.4             | 33.9        | 40.3              | 44.9              |
| Latino                                                    | 22.4                                                                  | 18.9             | 18.7        | 18.5              | 16.4              |
| Native Hawaiian                                           | 6.5                                                                   | 6.7              | 7.1         | 7.0               | 7.8               |
| White                                                     | 32.3                                                                  | 35.6             | 32.2        | 27.2              | 24.6              |
| Education (%)                                             |                                                                       |                  |             |                   |                   |
| ≤High school                                              | 31.6                                                                  | 27.6             | 27.3        | 27.8              | 30.2              |
| Vocational school                                         | 31.0                                                                  | 30.1             | 30.1        | 31.7              | 31.5              |
| ≥Graduated college                                        | 37.4                                                                  | 42.3             | 42.6        | 40.5              | 38.3              |
| Body mass index at baseline (kg/m <sup>2</sup> )          | 26.5 ± 3.8                                                            | 26.4 ± 3.8       | 26.3 ± 3.8  | 26.4 ± 3.8        | 26.5 ± 3.7        |
| Body mass index at 10-year follow-up (kg/m <sup>2</sup> ) | 27.0 ± 4.5                                                            | 26.8 ± 4.3       | 26.6 ± 4.2  | 26.6 ± 4.2        | 26.5 ± 4.1        |
| Smoking status at baseline (%)                            |                                                                       |                  |             |                   |                   |
| Never                                                     | 36.2                                                                  | 35.9             | 37.6        | 37.8              | 35.0              |
| Former                                                    | 51.8                                                                  | 51.5             | 49.6        | 48.5              | 50.9              |
| Current                                                   | 12.0                                                                  | 12.6             | 12.8        | 13.7              | 14.1              |
| Smoking status at 10-year follow-up (%)                   |                                                                       |                  |             |                   |                   |
| Never                                                     | 36.2                                                                  | 36.0             | 37.7        | 38.0              | 35.1              |
| Former                                                    | 56.0                                                                  | 55.5             | 55.1        | 54.8              | 58.5              |
| Current                                                   | 7.8                                                                   | 8.5              | 7.1         | 7.2               | 6.4               |
| Physical activity at baseline (h/d)                       | 1.5 ± 1.5                                                             | 1.5 ± 1.5        | 1.5 ± 1.5   | 1.5 ± 1.5         | 1.4 ± 1.5         |
| Physical activity at 10-year follow-up (h/d)              | 1.5 ± 1.7                                                             | 1.6 ± 1.6        | 1.7 ± 1.6   | 1.7 ± 1.6         | 1.7 ± 1.7         |
| Alcohol intake at baseline (g/day)                        | 12.8 ± 26.2                                                           | 15.4 ± 29.5      | 14.6 ± 27.3 | 14.9 ± 28.1       | 16.2 ± 30.9       |
| Alcohol intake at 10-year follow-up (g/day)               | 10.3 ± 21.6                                                           | 12.4 ± 22.2      | 11.6 ± 20.6 | 11.2 ± 18.9       | 11.7 ± 20.1       |
| History of hypertension at either survey                  | 54.6                                                                  | 53.0             | 51.8        | 52.1              | 53.6              |
| <b>Women, n</b>                                           | 2666                                                                  | 3440             | 16274       | 5759              | 6598              |
| DASH score at baseline                                    | 28.1 ± 3.5                                                            | 26.5 ± 3.8       | 24.7 ± 4.1  | 23.1 ± 4.0        | 21.4 ± 3.9        |
| DASH score at 10-year follow-up                           | 21.7 ± 3.5                                                            | 23.1 ± 3.9       | 24.9 ± 4.1  | 26.5 ± 4.0        | 28.3 ± 3.8        |
| Age at baseline (years)                                   | 59.2 ± 8.4                                                            | 58.7 ± 8.4       | 57.6 ± 8.3  | 56.7 ± 8.1        | 55.6 ± 7.9        |
| Age at 10-year follow-up (years)                          | 70.1 ± 8.5                                                            | 69.6 ± 8.4       | 68.5 ± 8.3  | 67.7 ± 8.1        | 66.6 ± 7.9        |
| Race and ethnicity (%)                                    |                                                                       |                  |             |                   |                   |
| African American                                          | 15.9                                                                  | 15.2             | 11.7        | 9.5               | 9.3               |
| Japanese American                                         | 26.8                                                                  | 30.4             | 33.3        | 38.5              | 40.1              |
| Latino                                                    | 18.9                                                                  | 16.5             | 15.5        | 14.4              | 15.2              |
| Native Hawaiian                                           | 8.2                                                                   | 7.4              | 7.3         | 7.5               | 8.9               |
| White                                                     | 30.1                                                                  | 30.5             | 32.2        | 30.1              | 26.5              |
| Education (%)                                             |                                                                       |                  |             |                   |                   |
| ≤High school                                              | 37.8                                                                  | 36.1             | 32.5        | 32.0              | 32.2              |
| Vocational school                                         | 31.7                                                                  | 31.4             | 32.3        | 31.2              | 33.4              |
| ≥Graduated college                                        | 30.5                                                                  | 32.5             | 35.2        | 36.8              | 34.4              |
| Body mass index at baseline (kg/m <sup>2</sup> )          | 26.2 ± 5.2                                                            | 25.8 ± 5.1       | 25.5 ± 5.0  | 25.2 ± 4.8        | 25.5 ± 5.1        |
| Body mass index at 10-year follow-up (kg/m <sup>2</sup> ) | 26.7 ± 5.8                                                            | 26.2 ± 5.5       | 26.0 ± 5.4  | 25.7 ± 5.2        | 25.8 ± 5.3        |
| Smoking status at baseline (%)                            |                                                                       |                  |             |                   |                   |
| Never                                                     | 58.3                                                                  | 61.8             | 61.2        | 62.4              | 62.4              |
| Former                                                    | 31.1                                                                  | 28.0             | 28.1        | 27.0              | 26.2              |
| Current                                                   | 10.7                                                                  | 10.2             | 10.7        | 10.7              | 11.4              |
| Smoking status at 10-year follow-up (%)                   |                                                                       |                  |             |                   |                   |
| Never                                                     | 58.5                                                                  | 62.0             | 61.3        | 62.5              | 62.5              |
| Former                                                    | 35.0                                                                  | 31.6             | 32.8        | 32.0              | 33.0              |
| Current                                                   | 6.5                                                                   | 6.4              | 5.8         | 5.5               | 4.6               |
| Physical activity at baseline (h/d)                       | 1.2 ± 1.2                                                             | 1.2 ± 1.3        | 1.2 ± 1.3   | 1.2 ± 1.3         | 1.2 ± 1.3         |
| Physical activity at 10-year follow-up (h/d)              | 1.2 ± 1.3                                                             | 1.4 ± 1.5        | 1.4 ± 1.4   | 1.5 ± 1.5         | 1.5 ± 1.5         |
| Alcohol intake at baseline (g/day)                        | 4.8 ± 14.1                                                            | 4.6 ± 13.0       | 5.0 ± 14.5  | 5.0 ± 14.9        | 4.2 ± 12.5        |
| Alcohol intake at 10-year follow-up (g/day)               | 4.1 ± 10.9                                                            | 4.0 ± 10.3       | 4.3 ± 11.0  | 4.0 ± 9.9         | 3.5 ± 9.8         |
| History of hypertension at either survey                  | 55.7                                                                  | 55.0             | 52.0        | 49.4              | 49.3              |

<sup>1</sup>Greatest decline: ≥ 1 SD decrease; moderate decline: 0.5-< 1 SD decrease; stable: < 0.5 SD change; moderate increase: 0.5-< 1 SD increase; greatest increase: ≥ 1 SD increase.
